# Supplementary material
Source: PubMed Central journal article supplement (PMC1892915)

Merge

Lef1

Shh

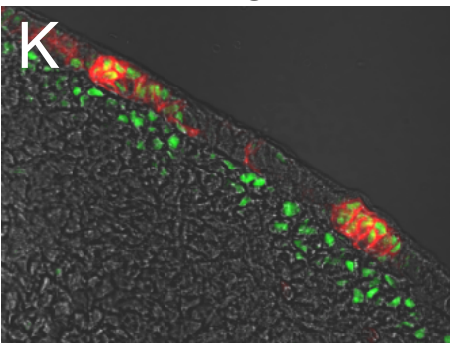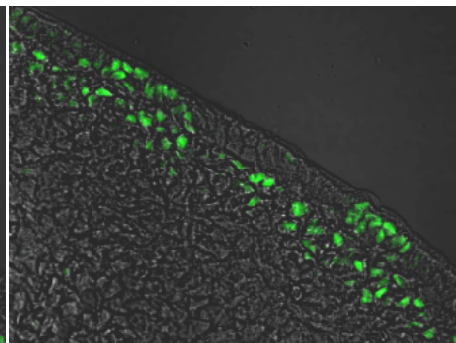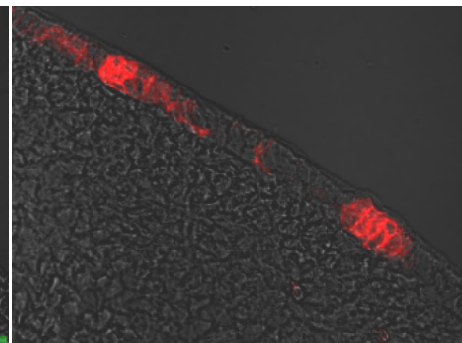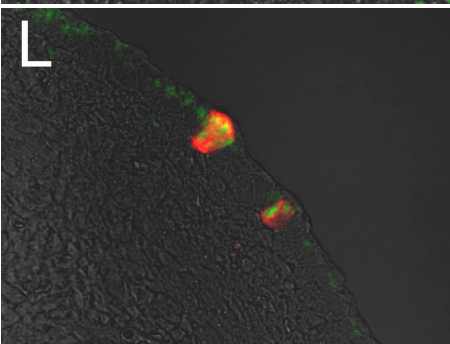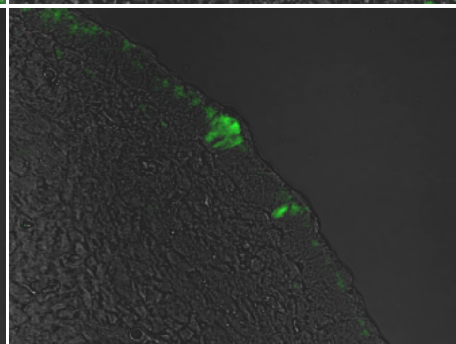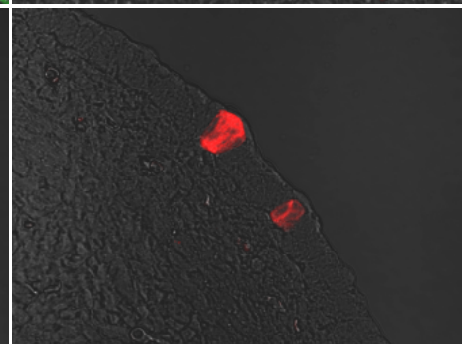

Merge

$\beta$ -gal

Shh

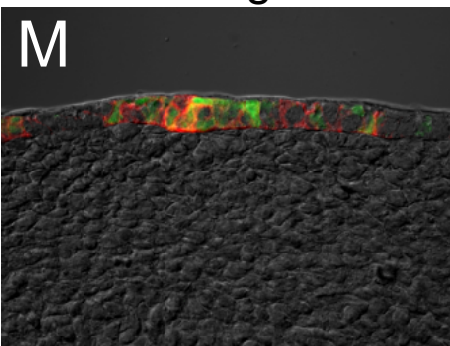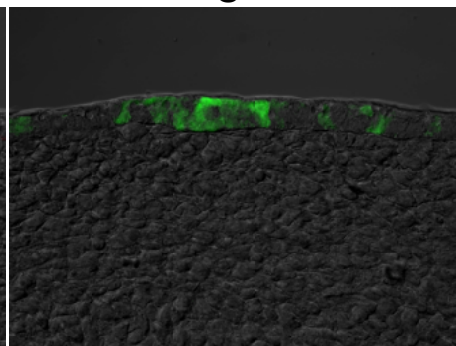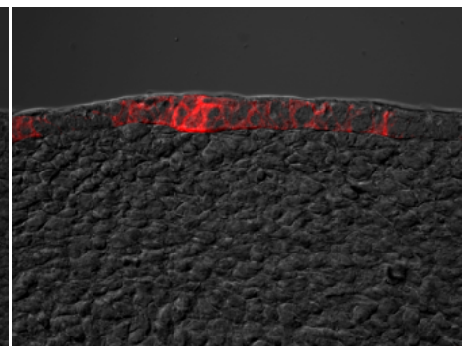

Supplement: pnas_0607399104_1.pdf [file pnas_0607399104_1.pdf]

**A**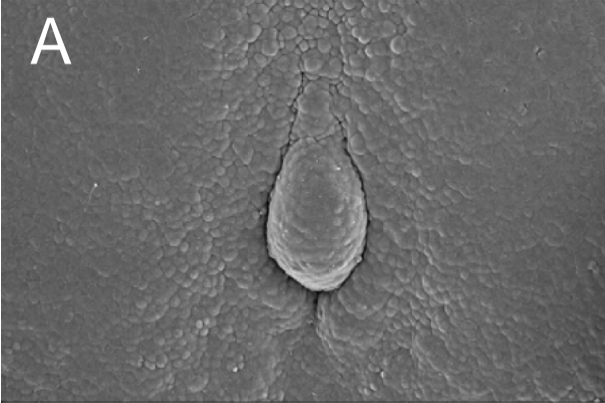**B**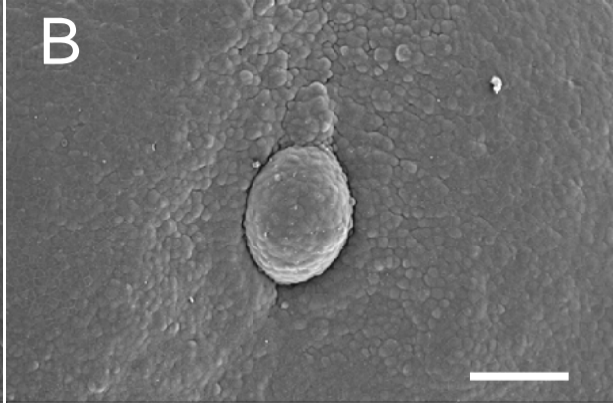

Supplement: pnas_0607399104_2.pdf [file pnas_0607399104_2.pdf]

**A**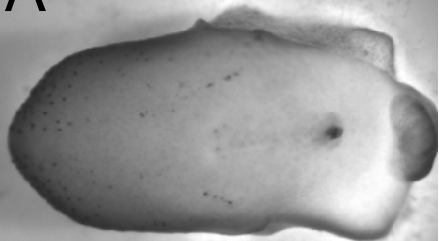**B**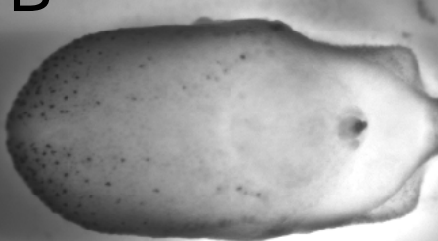**C**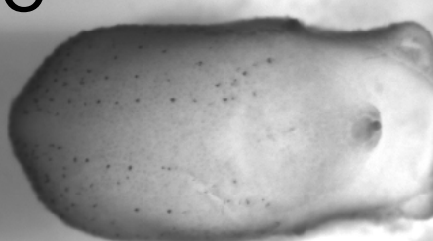**D**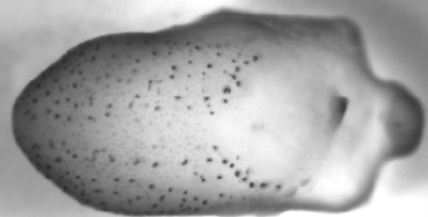**E**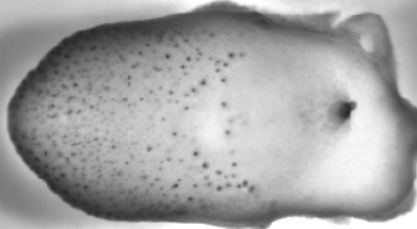**F**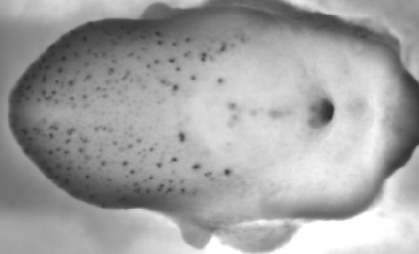

Supplement: pnas_0607399104_3.pdf [file pnas_0607399104_3.pdf]

**A**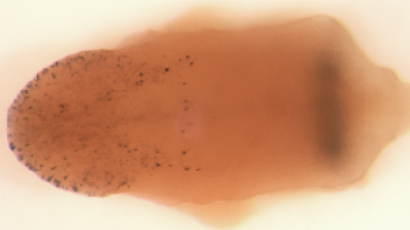**B**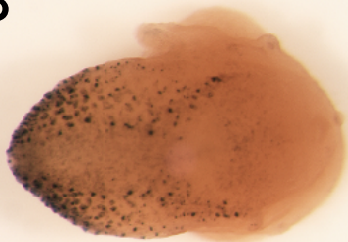**C**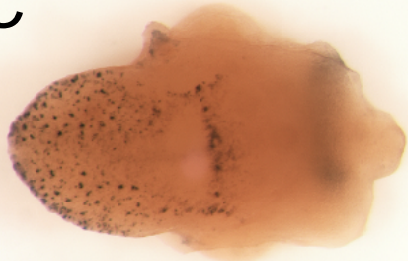**D**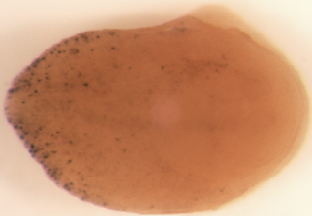**E**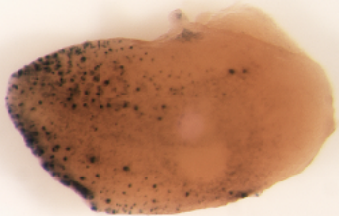**F**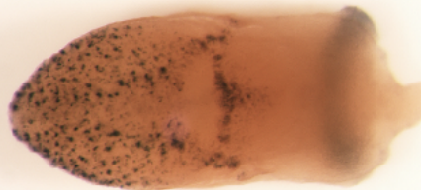

Supplement: pnas_0607399104_4.pdf [file pnas_0607399104_4.pdf]

**A**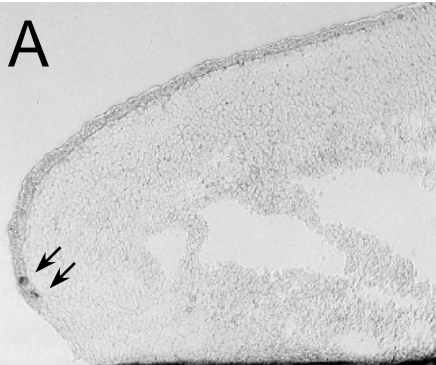**B**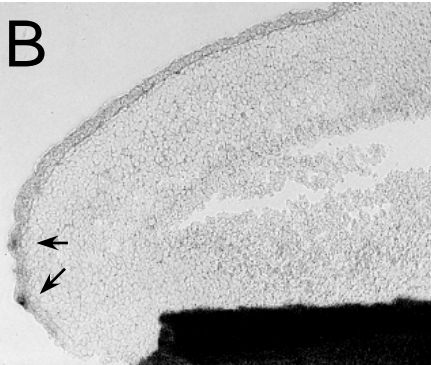**C**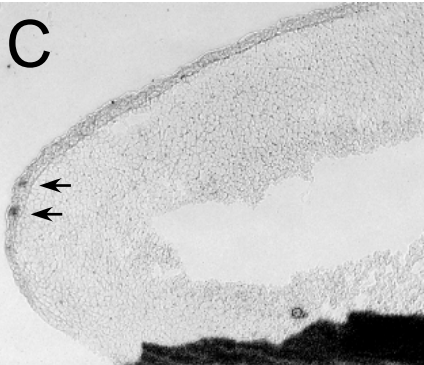**D**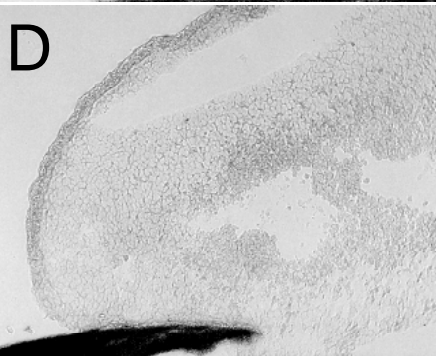**E**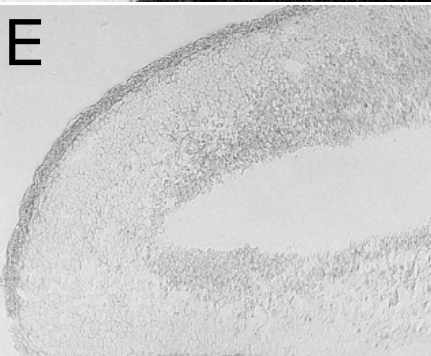**F**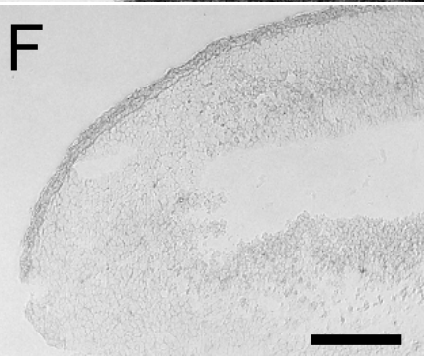

Supplement: pnas_0607399104_5.pdf [file pnas_0607399104_5.pdf]

Wt

Lef1 null

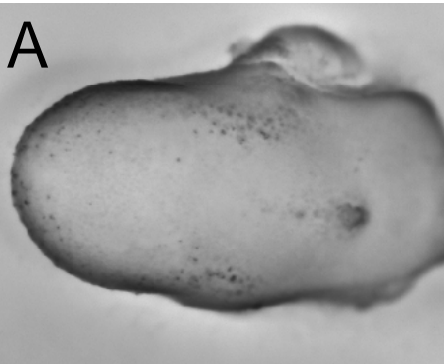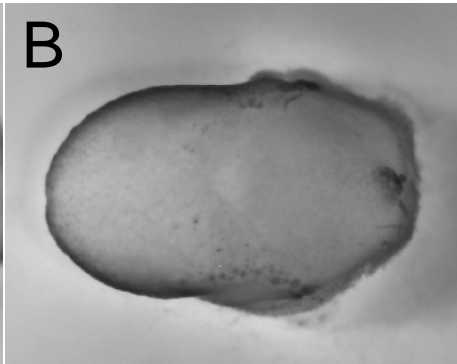

STAND

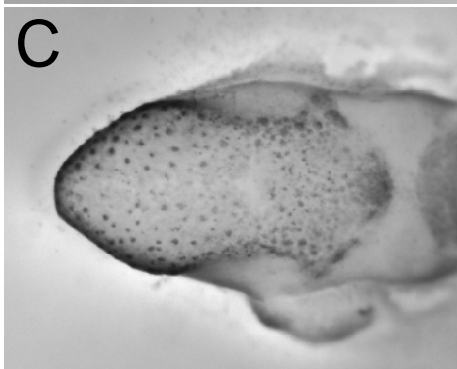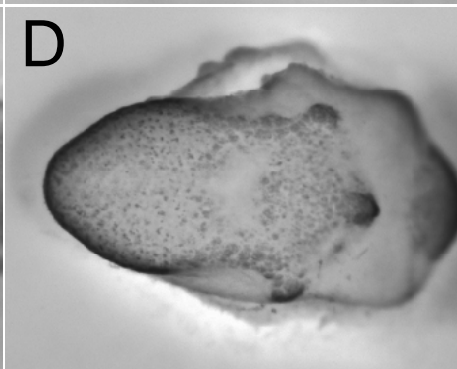

+5E1

Supplement: pnas_0607399104_6.pdf [file pnas_0607399104_6.pdf]
